# Supplementary material for: Mtb-Specific CD27low CD4 T Cells as Markers of Lung Tissue Destruction during Pulmonary Tuberculosis in Humans
Source: PubMed Central journal article supplement (PMC3427145; doi:10.1371/journal.pone.0043733), 2012-08-24
Supplement: pone.0043733.s001.pdf [file pone.0043733.s001.pdf]

**Table S1. Baseline characteristics of patients included in the study.**

| #  | Sex | Age | Group of patients <sup>1</sup> |            |                 |         | TB duration | Forms of lung TB pathology | Mtb in the sputum <sup>2</sup> | Mtb drug resistance <sup>3</sup> | TB extent <sup>4</sup>                                                                                              |        | Lung destruction <sup>5</sup>          |        |                        | Responsiveness to TB treatment <sup>6</sup> |                      |                     |                 |                      |
|----|-----|-----|--------------------------------|------------|-----------------|---------|-------------|----------------------------|--------------------------------|----------------------------------|---------------------------------------------------------------------------------------------------------------------|--------|----------------------------------------|--------|------------------------|---------------------------------------------|----------------------|---------------------|-----------------|----------------------|
|    |     |     | Main                           | Validation | Dynamic studies | Surgery |             |                            |                                |                                  | Affected areas of the lung                                                                                          | Scores | Numbers of destructive foci (size, cm) | Scores | Hematology test scores | Clinical TB severity scores                 | Infiltration (X-ray) | Destruction (X-ray) | Hematology test | Clinical TB severity |
| 1  | f   | 20  | +                              |            |                 |         | Recent      | TB infiltrate              | -                              | ND                               | UR: S <sub>1</sub> ,S <sub>2</sub>                                                                                  | 1      | multiple, small                        | 2      | 0                      | 0                                           | +                    | N                   | N               | N                    |
| 2  | m   | 27  | +                              |            |                 |         | Recent      | TB infiltrate              | +                              | MDR                              | UL: S <sub>1,2</sub>                                                                                                | 1      | one small                              | 1      | 1                      | 1                                           | ++                   | ++                  | ++              | ++                   |
| 3  | m   | 25  | +                              |            |                 |         | Recent      | Cavitary TB                | -                              | ND                               | UR: S <sub>3</sub>                                                                                                  | 1      | one small                              | 1      | 0                      | 0                                           | ++                   | ++                  | N               | N                    |
| 4  | f   | 41  | +                              |            |                 |         | Recent      | TB infiltrate              | ++                             | DR                               | UR: S <sub>3</sub> ; LR: S <sub>6</sub>                                                                             | 1      | none                                   | 0      | 2                      | 2                                           | +                    | N                   | ++              | +                    |
| 5  | f   | 25  | +                              |            |                 |         | Recent      | Cavitary TB                | -                              | ND                               | LR: S <sub>6</sub>                                                                                                  | 1      | multiple (2.0 x 4.0)                   | 3      | 1                      | 2                                           | +                    | +                   | ++              | ++                   |
| 6  | f   | 30  | +                              |            |                 |         | Recent      | TB infiltrate              | -                              | ND                               | UR: S <sub>1</sub> ,S <sub>2</sub>                                                                                  | 1      | none                                   | 0      | 1                      | 0                                           | ++                   | N                   | ++              | N                    |
| 7  | f   | 37  | +                              |            |                 |         | Recent      | TB infiltrate              | +                              | s                                | UR, LR, LL                                                                                                          | 3      | one (2.2 x 1.4)                        | 2      | 2                      | 0                                           | +                    | +                   | +               | N                    |
| 8  | f   | 28  | +                              |            |                 |         | Recent      | TB infiltrate              | -                              | s*                               | LR: S <sub>10</sub> ; MR: S <sub>5</sub>                                                                            | 1      | none                                   | 0      | 1                      | 1                                           | +                    | N                   | ++              | ++                   |
| 9  | m   | 20  | +                              |            |                 |         | Recent      | TB infiltrate              | +                              | s                                | LR: S <sub>7</sub> , S <sub>8</sub> , S <sub>9</sub> ; LL: S <sub>6</sub>                                           | 2      | two small                              | 2      | 2                      | 2                                           | ++                   | +                   | ++              | ++                   |
| 10 | m   | 40  | +                              |            |                 |         | Recent      | TB infiltrate              | +++                            | MDR                              | UR                                                                                                                  | 2      | none                                   | 0      | 3                      | 1                                           | +                    | N                   | 0               | ++                   |
| 11 | f   | 23  | +                              |            |                 |         | Recent      | Tuberculoma                | ++                             | s                                | UR: S <sub>1</sub> ,S <sub>2</sub> ; LR: S <sub>6</sub> ; LL: S <sub>6</sub>                                        | 2      | two small                              | 2      | 0                      | 2                                           | +                    | +                   | N               | ++                   |
| 12 | f   | 25  | +                              |            |                 |         | Recent      | TB infiltrate              | +                              | MDR                              | LR: S <sub>6</sub>                                                                                                  | 1      | none                                   | 0      | 0                      | 1                                           | +                    | N                   | N               | ++                   |
| 13 | m   | 40  | +                              |            |                 |         | Chronic     | Tuberculoma                | +++                            | MDR                              | UL: UR                                                                                                              | 2      | none                                   | 0      | 0                      | 0                                           | +                    | N                   | N               | N                    |
| 14 | f   | 40  | +                              |            |                 |         | Recent      | Cavitary TB                | +                              | MDR                              | UL: S <sub>1,2</sub> ,S <sub>3</sub>                                                                                | 1      | two small                              | 2      | 2                      | 1                                           | +                    | +                   | 0               | 0                    |
| 15 | f   | 31  | +                              |            |                 |         | Chronic     | TB infiltrate              | +                              | MDR                              | LL                                                                                                                  | 2      | none                                   | 0      | 1                      | 0                                           | +                    | N                   | ++              | N                    |
| 16 | f   | 32  | +                              |            |                 |         | Recent      | TB infiltrate              | +                              | s                                | UL: S <sub>1,2</sub>                                                                                                | 1      | one small                              | 1      | 0                      | 0                                           | +                    | ++                  | N               | N                    |
| 17 | m   | 27  | +                              |            |                 |         | Recent      | Tuberculoma                | +                              | s                                | UR: S <sub>1</sub> ,S <sub>2</sub> ; MR; LL                                                                         | 2      | multiple, small                        | 2      | 1                      | 0                                           | +                    | 0                   | ++              | N                    |
| 18 | f   | 27  | +                              |            |                 |         | Chronic     | Caseous pn.                | +++                            | XDR                              | both lungs                                                                                                          | 4      | multiple, system (9.0 x 7.0)           | 3      | 3                      | 3                                           | 0                    | 0                   | 0               | 0                    |
| 19 | f   | 22  | +                              |            |                 |         | Recent      | TB infiltrate              | +                              | s                                | UL: S <sub>1,2</sub> ; LL: S <sub>6</sub>                                                                           | 1      | multiple small                         | 2      | 0                      | 0                                           | +                    | +                   | N               | N                    |
| 20 | f   | 57  | +                              |            |                 |         | Recent      | TB infiltrate              | +                              | s                                | UR: S <sub>1</sub> ,S <sub>2</sub> ; UL: S <sub>1,2</sub> ; LL: S <sub>6</sub>                                      | 2      | none                                   | 0      | 1                      | 0                                           | +                    | N                   | 0               | N                    |
| 21 | f   | 39  | +                              |            |                 |         | Recent      | TB infiltrate              | +                              | s                                | UR: S <sub>1</sub> ,S <sub>2</sub> ; LR: S <sub>6</sub>                                                             | 1      | one small                              | 1      | 3                      | 1                                           | +                    | N                   | ++              | ++                   |
| 22 | m   | 27  | +                              |            |                 |         | Chronic     | Cavitary TB                | +                              | MDR                              | both lungs                                                                                                          | 4      | multiple (4.7 x 2.8)                   | 3      | 1                      | 1                                           | 0                    | +                   | 0               | ++                   |
| 23 | m   | 18  | +                              |            |                 |         | Recent      | TB infiltrate              | -                              | N/A                              | UL: S <sub>1,2</sub>                                                                                                | 1      | none                                   | 0      | 0                      | 0                                           | ++                   | N                   | N               | N                    |
| 24 | f   | 53  | +                              |            |                 |         | Chronic     | TB infiltrate              | +                              | MDR                              | UL; UR                                                                                                              | 2      | none                                   | 0      | 1                      | 0                                           | 0                    | N                   | 0               | N                    |
| 25 | f   | 28  | +                              |            |                 |         | Recent      | TB infiltrate              | +                              | MDR                              | UR: S <sub>1</sub> ,S <sub>2</sub>                                                                                  | 1      | none                                   | 0      | 0                      | 0                                           | +                    | N                   | N               | N                    |
| 26 | f   | 30  | +                              |            |                 |         | Recent      | Tuberculoma                | -                              | ND                               | UR                                                                                                                  | 2      | none                                   | 0      | 0                      | 0                                           | +                    | N                   | N               | N                    |
| 27 | m   | 33  | +                              |            |                 |         | Recent      | TB infiltrate              | +                              | s                                | UR: S <sub>2</sub>                                                                                                  | 1      | none                                   | 0      | 3                      | 1                                           | +                    | N                   | +               | ++                   |
| 28 | f   | 33  | +                              |            |                 |         | Recent      | TB infiltrate              | +                              | MDR                              | UL: S <sub>1,2</sub>                                                                                                | 1      | one small                              | 1      | 1                      | 0                                           | +                    | N                   | ++              | N                    |
| 29 | m   | 60  | +                              |            |                 |         | Recent      | Tuberculoma                | +                              | s                                | UL: S <sub>3</sub>                                                                                                  | 1      | none                                   | 0      | 0                      | 0                                           | +                    | N                   | N               | N                    |
| 30 | f   | 43  | +                              |            |                 |         | Recent      | TB infiltrate              | +++                            | MDR                              | UL: S <sub>1,2</sub> ,S <sub>4</sub> ,S <sub>5</sub> ; UR: S <sub>2</sub>                                           | 2      | multiple (3.5 x 2.0)                   | 3      | 2                      | 1                                           | +                    | 0                   | +               | 0                    |
| 31 | f   | 30  | +                              |            |                 |         | Recent      | TB infiltrate              | +++                            | s                                | UR; UL: S <sub>4</sub> ; LL: S <sub>10</sub>                                                                        | 3      | one small                              | 1      | 0                      | 1                                           | +                    | 0                   | N               | ++                   |
| 32 | m   | 25  | +                              |            |                 |         | Recent      | Caseous pn.                | +                              | s                                | left lung                                                                                                           | 4      | multiple, system                       | 3      | 3                      | 3                                           | 0                    | 0                   | +               | +                    |
| 33 | f   | 33  | +                              |            |                 |         | Chronic     | Cavitary TB                | +                              | MDR                              | UR; UL                                                                                                              | 2      | multiple, system                       | 3      | 2                      | 3                                           | +                    | 0                   | +               | +                    |
| 34 | m   | 47  | +                              |            |                 |         | Chronic     | Cavitary TB                | ++                             | XDR                              | both lungs                                                                                                          | 4      | multiple, system (4.0 x 1.6)           | 3      | 3                      | 1                                           | +                    | 0                   | 0               | 0                    |
| 35 | m   | 23  | +                              |            |                 |         | Recent      | Cavitary TB                | +++                            | s                                | UR                                                                                                                  | 2      | multiple (3.0 x 2.5)                   | 3      | 3                      | 2                                           | +                    | +                   | ++              | ++                   |
| 36 | m   | 71  | +                              |            |                 |         | Recent      | Caseous pn.                | +++                            | MDR                              | both lungs                                                                                                          | 4      | multiple, system (8.8 x 3.0)           | 3      | 3                      | 3                                           | 0                    | 0                   | +               | +                    |
| 37 | m   | 33  | +                              |            |                 |         | Chronic     | Cavitary TB                | +++                            | XDR                              | both lungs                                                                                                          | 4      | multiple, system                       | 3      | 3                      | 3                                           | 0                    | 0                   | +               | +                    |
| 38 | f   | 29  | +                              |            |                 |         | Chronic     | Cavitary TB                | ++                             | XDR                              | both lungs                                                                                                          | 4      | multiple, system                       | 3      | 2                      | 3                                           | +                    | 0                   | 0               | +                    |
| 39 | f   | 31  | +                              |            |                 |         | Recent      | TB infiltrate              | ++                             | MDR                              | UL: S <sub>1,2</sub>                                                                                                | 1      | multiple, small                        | 2      | 2                      | 2                                           | +                    | +                   | ++              | ++                   |
| 40 | m   | 62  | +                              |            |                 |         | Recent      | Caseous pn.                | ++                             | MDR                              | UR; UL; MR; LL                                                                                                      | 4      | multiple, system                       | 3      | 2                      | 3                                           | +                    | 0                   | 0               | +                    |
| 41 | f   | 39  | +                              |            |                 |         | Chronic     | TB infiltrate              | +                              | s                                | UL: S <sub>1,2</sub> , S <sub>4</sub> , S <sub>5</sub> ; LL: S <sub>6</sub>                                         | 2      | two small                              | 2      | 0                      | 0                                           | +                    | +                   | N               | N                    |
| 42 | f   | 35  | +                              |            |                 |         | Recent      | TB infiltrate              | ++                             | s                                | left lung                                                                                                           | 4      | multiple, system (1.7 x 0.9)           | 3      | 3                      | 0                                           | +                    | ++                  | +               | N                    |
| 43 | m   | 32  | +                              |            |                 |         | Recent      | TB infiltrate              | ++                             | s                                | UR; UL                                                                                                              | 2      | multiple (2.5 x 1.3)                   | 3      | 1                      | 2                                           | +                    | +                   | ++              | ++                   |
| 44 | f   | 24  | +                              |            |                 |         | Recent      | TB infiltrate              | ++                             | s                                | UR: S <sub>1</sub> ,S <sub>2</sub> ; UL: S <sub>1,2</sub>                                                           | 1      | multiple (3.5 x 3.5)                   | 3      | 3                      | 1                                           | +                    | +                   | +               | ++                   |
| 45 | f   | 26  | +                              |            |                 |         | Recent      | TB infiltrate              | +                              | s                                | UR: S <sub>1</sub> ,S <sub>2</sub> ; MR: S <sub>5</sub>                                                             | 1      | two small                              | 2      | 1                      | 1                                           | +                    | ++                  | 0               | ++                   |
| 46 | f   | 30  | +                              |            |                 |         | Recent      | TB infiltrate              | +                              | MDR                              | UR: S <sub>2</sub> ; LR: S <sub>6</sub> ; UL: S <sub>1,2</sub> ,S <sub>4</sub> ,S <sub>5</sub> ; LL: S <sub>6</sub> | 2      | multiple, system (2.0 x 2.0)           | 3      | 2                      | 1                                           | 0                    | 0                   | 0               | 0                    |
| 47 | f   | 44  | +                              |            |                 |         | Recent      | TB infiltrate              | ++                             | MDR                              | left lung                                                                                                           | 4      | three (2.9 x 1.6)                      | 3      | 3                      | 1                                           | +                    | 0                   | ++              | ++                   |
| 48 | m   | 37  | +                              |            |                 |         | Chronic     | Cavitary TB                | ++                             | MDR                              | both lungs                                                                                                          | 4      | multiple (2.5 x 1.5)                   | 3      | 1                      | 1                                           | ++                   | 0                   | 0               | ++                   |
| 49 | m   | 21  | +                              |            |                 |         | Recent      | TB infiltrate              | +++                            | MDR                              | both lungs                                                                                                          | 4      | two small                              | 2      | 3                      | 2                                           | ++                   | ++                  | ++              | ++                   |
| 50 | m   | 49  | +                              |            |                 |         | Recent      | Caseous pn.                | +                              | MDR                              | both lungs                                                                                                          | 4      | multiple (2.1 x 1.4)                   | 3      | 3                      | 3                                           | 0                    | 0                   | 0               | 0                    |
| 52 | f   | 30  | +                              |            |                 |         | Recent      | Caseous pn.                | +++                            | s                                | left lung; UR                                                                                                       | 4      | multiple (2.5 x 2.5)                   | 3      | 3                      | 3                                           | +                    | 0                   | ++              | ++                   |
| 54 | f   | 31  | +                              |            |                 |         | Recent      | TB infiltrate              | +                              | DR                               | UR: S <sub>1</sub> , S <sub>2</sub>                                                                                 | 1      | multiple (2.0 x 2.0)                   | 3      | 1                      | 0                                           | +                    | 0                   | ++              | N                    |
| 51 | m   | 76  | +                              |            |                 |         | Chronic     | TB infiltrate              | +                              | MDR                              | UR: S <sub>1</sub> ; UL: S <sub>1,2</sub> ; LL: S <sub>6</sub>                                                      | 2      | multiple (2.0 x 2.0)                   | 3      | 2                      | 1                                           | 0                    | 0                   | ++              | ++                   |
| 53 | f   | 33  | +                              |            |                 |         | Recent      | TB infiltrate              | +                              | DR                               | LR: S <sub>10</sub> ; LL: S <sub>6</sub> , S <sub>8</sub>                                                           | 1      | multiple (1.5 x 3.0)                   | 3      | 3                      | 1                                           | ++                   | ++                  | 0               | ++                   |
| 55 | f   | 25  | +                              |            |                 |         | Recent      | Tuberculoma                | +                              | MDR                              | UR: S <sub>2</sub>                                                                                                  | 1      | none                                   | 0      | 0                      | 0                                           | ++                   | N                   | N               | N                    |
| 56 | f   | 33  | +                              |            |                 |         | Chronic     | Cavitary TB                | +                              | s                                | UR; UL                                                                                                              | 2      | two small                              | 2      | 0                      | 0                                           | +                    | +                   | N               | N                    |
| 57 | m   | 18  | +                              |            |                 |         | Recent      | TB infiltrate              | ++                             | s                                | UL                                                                                                                  | 2      | one small                              | 1      | 0                      | 0                                           | ++                   | +                   | N               | N                    |
| 58 | m   | 45  | +                              |            |                 |         | Recent      | TB infiltrate              | +                              | s                                | left lung                                                                                                           | 4      | none                                   | 0      | 0                      | 0                                           | ++                   | N                   | N               | N                    |
| 59 | m   | 30  | +                              |            |                 |         | Recent      | TB infiltrate              | +                              | DR                               | UR: S <sub>1</sub> ; UL: S <sub>1,2</sub>                                                                           | 1      | multiple small                         | 2      | 1                      | 1                                           | +                    | +                   | ++              | ++                   |
| 60 | m   | 27  | +                              |            |                 |         | Recent      | TB infiltrate              | +                              | DR                               | UL: S <sub>1,2</sub>                                                                                                | 1      | one small                              | 1      | 1                      | 1                                           | +                    | +                   | ++              | 0                    |
| 61 | m   | 29  | +                              |            |                 |         | Recent      | TB infiltrate              | +++                            | MDR                              | UR: S <sub>1</sub> ,S <sub>2</sub> ,S <sub>3</sub> ; MR: S <sub>4</sub> ; LR: S <sub>6</sub> , S <sub>10</sub>      | 2      | one (3.0 x 4.0)                        | 2      | 2                      | 2                                           | 0                    | 0                   | +               | 0                    |
| 62 | m   | 43  | +                              |            |                 |         | Recent      | TB infiltrate              | +++                            | MDR                              | UR; UL; MR                                                                                                          | 3      | multiple (4.0 x 5.0)                   | 3      | 3                      | 2                                           | 0                    | 0                   | +               | +                    |
| 63 | m   | 34  | +                              |            |                 |         | Chronic     | Cavitary TB                | +++                            | s                                | both lungs                                                                                                          | 4      | multiple,system (5.0 x 5.0)            | 3      | 3                      | 3                                           | +                    | +                   | ++              | ++                   |
| 64 | m   | 21  | +                              |            |                 |         | Chronic     | Cavitary TB                | +                              | DR                               | left lung; UR                                                                                                       | 4      | multiple, small                        | 2      | 1                      | 1                                           | +                    | +                   | ++              | ++                   |
| 65 | f   | 25  | +                              |            |                 |         | Recent      | Cavitary TB                | +                              | s                                | UL: S <sub>1,2</sub> ,S <sub>4</sub> ,S <sub>5</sub> ; LL: S <sub>6</sub> ,S <sub>10</sub>                          | 2      | multiple (3.0 x 2.3)                   | 3      | 0                      | 0                                           | +                    | +                   | N               | N                    |
| 66 | m   | 49  | +                              |            |                 |         | Recent      | Tuberculoma                | -                              | ND                               | UR: S <sub>1</sub> ,S <sub>2</sub> ,S <sub>3</sub>                                                                  | 1      | none                                   | 0      | 0                      | 0                                           | +                    | +                   | N               | N                    |
| 67 | m   | 51  | +                              |            |                 |         | Chronic     | Cavitary TB                | +++                            | XDR                              | UR; UL                                                                                                              | 2      | multiple,system (2.0 x 2.0)            | 3      | 3                      | 2                                           | +                    | +                   | ++              | ++                   |
| 68 | f   | 38  | +                              |            |                 |         | Chronic     | Cavitary TB                | -                              | ND                               | MR; UR: S <sub>3</sub> ; LR: S <sub>6</sub> ; LL: S <sub>8</sub> ,S <sub>9</sub> ,S <sub>10</sub>                   | 2      | multiple, small                        | 2      | 0                      | 1                                           | +                    | +                   | ++              | ++                   |
| 69 | f   | 33  | +                              |            |                 |         | Chronic     | Cavitary TB                | +                              | s                                | UR; UL: S <sub>1,2</sub>                                                                                            | 2      | two small                              | 2      | 0                      | 0                                           | +                    | +                   | N               | N                    |
| 70 | f   | 28  | +                              |            |                 |         | Chronic     | Tuberculoma                | -                              | ND                               | UL: S <sub>1,2</sub> ; UR                                                                                           | 2      | none                                   | 0      | 1                      | 0                                           | +                    | +                   | ++              | N                    |
