# Supplementary material for: Mtb-Specific CD27low CD4 T Cells as Markers of Lung Tissue Destruction during Pulmonary Tuberculosis in Humans
Source: PubMed Central journal article supplement (PMC3427145; doi:10.1371/journal.pone.0043733), 2012-08-24
Supplement: pone.0043733.s002.pdf [file pone.0043733.s002.pdf]

**Table S2. Characterization of TB contacts and *Mtb*- unexposed participants.**

| <b>TB contacts</b>   | <b>Gender</b> | <b>Age</b> | <b>Duration of TB exposure<sup>1</sup></b> | <b>Result of QFT test</b> |
|----------------------|---------------|------------|--------------------------------------------|---------------------------|
| 1                    | f             | 29         | 1                                          | -                         |
| 2                    | m             | 42         | 4                                          | -                         |
| 3                    | f             | 61         | 35                                         | +                         |
| 4                    | m             | 34         | 2                                          | -                         |
| 5                    | f             | 63         | 38                                         | -                         |
| 6                    | f             | 74         | 51                                         | +                         |
| 7                    | f             | 52         | 33                                         | +                         |
| 8                    | f             | 35         | 11                                         | -                         |
| 9                    | f             | 28         | 7                                          | +                         |
| 10                   | f             | 60         | 15                                         | -                         |
| 11                   | f             | 40         | 12                                         | +                         |
| 12                   | f             | 43         | 6                                          | -                         |
| 13                   | f             | 70         | 1,5                                        | +                         |
| 14                   | f             | 54         | 1,5                                        | +                         |
| 15                   | f             | 45         | 7                                          | +                         |
| 16                   | f             | 73         | 1                                          | -                         |
| 17                   | f             | 41         | 6                                          | -                         |
| 18                   | m             | 35         | 12                                         | +                         |
| 19                   | m             | 48         | 20                                         | +                         |
| 20                   | f             | 25         | 3                                          | -                         |
| 21                   | m             | 40         | 15                                         | -                         |
| <b>Mtb-unexposed</b> |               |            |                                            |                           |
| 1                    | m             | 25         | NA <sup>2</sup>                            | -                         |
| 2                    | f             | 51         | NA                                         | -                         |
| 3                    | f             | 30         | NA                                         | -                         |
| 4                    | f             | 22         | NA                                         | -                         |
| 5                    | m             | 23         | NA                                         | -                         |
| 6                    | f             | 19         | NA                                         | -                         |
| 7                    | m             | 21         | NA                                         | -                         |
| 8                    | m             | 21         | NA                                         | -                         |
| 9                    | f             | 58         | NA                                         | -                         |
| 10                   | f             | 52         | NA                                         | -                         |
| 11                   | m             | 23         | NA                                         | -                         |
| 12                   | m             | 71         | NA                                         | -                         |
| 13                   | m             | 28         | NA                                         | -                         |
| 14                   | f             | 60         | NA                                         | -                         |
| 15                   | f             | 61         | NA                                         | -                         |
