# Supplementary material for: Mtb-Specific CD27low CD4 T Cells as Markers of Lung Tissue Destruction during Pulmonary Tuberculosis in Humans
Source: PubMed Central journal article supplement (PMC3427145; doi:10.1371/journal.pone.0043733), 2012-08-24
Supplement: pone.0043733.s003.pdf [file pone.0043733.s003.pdf]

**Table S3. Lack of correlation between TB manifestations and numbers of CD27<sup>low</sup> IFN- $\gamma$ <sup>+</sup> cells in the blood of TB patients.**

| Factors                          | Simple correlation<br>(Spearman) |         |
|----------------------------------|----------------------------------|---------|
|                                  | rho                              | p-value |
| Lung tissue destruction          | 0.23                             | 0.11    |
| Clinical TB severity             | 0.16                             | 0.26    |
| Hematology abnormalities         | 0.18                             | 0.22    |
| Sputum <i>Mtb</i> positivity     | -0.10                            | 0.50    |
| TB extent                        | 0.16                             | 0.28    |
| <i>Mtb</i> multi-drug resistance | -0.04                            | 0.78    |
| TB duration                      | -0.11                            | 0.45    |
