# Supplementary material for: Mtb-Specific CD27low CD4 T Cells as Markers of Lung Tissue Destruction during Pulmonary Tuberculosis in Humans
Source: PubMed Central journal article supplement (PMC3427145; doi:10.1371/journal.pone.0043733), 2012-08-24
Supplement: pone.0043733.s004.pdf [file pone.0043733.s004.pdf]

**Table S4. Percentages and numbers of IFN- $\gamma$ <sup>+</sup> and CD27<sup>low</sup> IFN- $\gamma$ <sup>+</sup> cells in the lungs and in blood of surgery operated patients.**

| Patient/<br>parameter                   | IFN- $\gamma$ <sup>+</sup> cells |       |      |         |       |     | CD27 <sup>low</sup> IFN- $\gamma$ <sup>+</sup> cells |       |      |         |       |     |
|-----------------------------------------|----------------------------------|-------|------|---------|-------|-----|------------------------------------------------------|-------|------|---------|-------|-----|
|                                         | Percentages (%)                  |       |      | Numbers |       |     | Percentages (%)                                      |       |      | Numbers |       |     |
|                                         | Blood                            | Lung  | LN   | Blood   | Lung  | LN  | Blood                                                | Lung  | LN   | Blood   | Lung  | LN  |
| <b>Analysis of individual patients:</b> |                                  |       |      |         |       |     |                                                      |       |      |         |       |     |
| Patient A                               | 0,37                             | 10,6  | 0,14 | 472     | 3471  | 445 | 66,4                                                 | 96,1  | 45,2 | 313     | 3335  | 201 |
| Patient B                               | 0,21                             | 18,6  | ND   | 139     | 20935 | ND  | 53,8                                                 | 83,3  | ND   | 75      | 17439 | ND  |
| Patient C                               | 0,64                             | 6,98  | ND   | 1536    | 23677 | ND  | 70,5                                                 | 97,6  | ND   | 1083    | 23108 | ND  |
| Patient D                               | 0,70                             | 3,04  | ND   | 894     | 842   | ND  | 47,5                                                 | 88,9  | ND   | 425     | 748   | ND  |
| Patient E                               | 1,10                             | 1,65  | ND   | 833     | 1623  | ND  | 73,5                                                 | 76,7  | ND   | 612     | 1245  | ND  |
| Patient F                               | 0,21                             | 0,69  | 0,22 | 143     | 1034  | 728 | 45,5                                                 | 94,1  | 45,2 | 65      | 973   | 329 |
| Patient G                               | 0,40                             | 1,74  | ND   | 603     | 3554  | ND  | 48,4                                                 | 83,3  | ND   | 292     | 2960  | ND  |
| Patient H                               | 0,21                             | 5,65  | ND   | 232     | 5221  | ND  | 29,5                                                 | 91,9  | ND   | 68      | 4798  | ND  |
| <b>Statistical analysis:</b>            |                                  |       |      |         |       |     |                                                      |       |      |         |       |     |
| Median                                  | 0,39                             | 4,35  | ND   | 538     | 3513  | ND  | 51,1                                                 | 90,4  | ND   | 303     | 3148  | ND  |
| Inter-patient differences <sup>1</sup>  | 5,24                             | 26,96 | ND   | 11      | 28    | ND  | 2,5                                                  | 1,3   | ND   | 17      | 31    | ND  |
| Coefficient of variation                | 66%                              | 99%   | ND   | 79%     | 123%  | ND  | 27%                                                  | 8%    | ND   | 95%     | 125%  | ND  |
| <b>Correlations<sup>2</sup>:</b>        |                                  |       |      |         |       |     |                                                      |       |      |         |       |     |
| Lung vs blood, rho                      | -0,27                            |       | ND   | -0,07   |       | ND  | -0,11                                                |       | ND   | 0,12    |       | ND  |
| p-value                                 | 0,52                             |       | ND   | 0,88    |       | ND  | 0,80                                                 |       | ND   | 0,79    |       | ND  |
| Destruction vs cells, rho               | 0,35                             | 0,11  | ND   | 0,28    | 0,24  | ND  | <b>0,88</b>                                          | 0,19  | ND   | 0,48    | 0,31  | ND  |
| p-value                                 | 0,40                             | 0,79  | ND   | 0,51    | 0,57  | ND  | <b>0,01</b>                                          | 0,65  | ND   | 0,23    | 0,45  | ND  |
| TB severity vs cells, rho               | -0,05                            | 0,06  | ND   | -0,36   | -0,24 | ND  | 0,46                                                 | -0,09 | ND   | -0,17   | -0,10 | ND  |
| p-value                                 | 0,90                             | 0,88  | ND   | 0,38    | 0,56  | ND  | 0,25                                                 | 0,83  | ND   | 0,69    | 0,81  | ND  |
